# Supplementary material for: Recovery of Rare Earth Elements from the Leaching Solutions of Spent NdFeB Permanent Magnets by Selective Precipitation of Rare Earth Oxalates
Source: MDPI journal article supplement (doi:10.3390/min13070846), 2023-06-22
Supplement: s1 [file s1]

Archive with 1 entries (1 files):
- minerals-2396269-supplementary.pdf
