# Supplementary material for: Recovery of Rare Earth Elements from the Leaching Solutions of Spent NdFeB Permanent Magnets by Selective Precipitation of Rare Earth Oxalates
Source: MDPI journal article supplement (doi:10.3390/min13070846), 2023-06-22
Supplement: s1 [file s1 › minerals-2396269-supplementary.pdf]

## Supplementary Materials

**Table S1.** The concentrations of all elements in the hydrochloric leaching solution before and after precipitation of oxalates, analyzed with ICP-OES technique.

| Ratio between added amount of oxalic acid and its stoichiometric amount | Concentration of elements in the leaching solution [g·L <sup>-1</sup> ]                        |      |        |      |       |      |       |        |
|-------------------------------------------------------------------------|------------------------------------------------------------------------------------------------|------|--------|------|-------|------|-------|--------|
|                                                                         | B                                                                                              | Co   | Ni     | Fe   | Dy    | Nd   | Pr    | Tb     |
|                                                                         | 0.635                                                                                          | 1.78 | 0.0175 | 35.6 | 1.65  | 18.6 | 0.880 | 0.0017 |
|                                                                         | Concentration of elements in the solution after precipitation of oxalates [g·L <sup>-1</sup> ] |      |        |      |       |      |       |        |
|                                                                         | B                                                                                              | Co   | Ni     | Fe   | Dy    | Nd   | Pr    | Tb     |
| 0.8                                                                     | 0.634                                                                                          | 1.71 | 0.0175 | 35.5 | 0.887 | 8.21 | 0.505 | 0.0016 |
| 1.0                                                                     | 0.631                                                                                          | 1.77 | 0.0174 | 35.4 | 0.720 | 5.95 | 0.390 | 0.0011 |
| 1.2                                                                     | 0.635                                                                                          | 1.70 | 0.0170 | 35.0 | 0.472 | 3.64 | 0.263 | 0.0011 |
| 1.4                                                                     | 0.601                                                                                          | 1.54 | 0.0167 | 33.9 | 0.255 | 1.87 | 0.124 | 0.0009 |

**Table S2.** The concentrations of all elements in the sulfuric leaching solution before and after precipitation of oxalates, analyzed with ICP-OES technique.

| Ratio between added amount of oxalic acid and its stoichiometric amount | Concentration of elements in the leaching solution [g·L <sup>-1</sup> ]                        |      |        |      |        |       |       |        |
|-------------------------------------------------------------------------|------------------------------------------------------------------------------------------------|------|--------|------|--------|-------|-------|--------|
|                                                                         | B                                                                                              | Co   | Ni     | Fe   | Dy     | Nd    | Pr    | Tb     |
|                                                                         | 0.605                                                                                          | 1.23 | 0.015  | 33.4 | 1.13   | 15.8  | 0.957 | 0.0026 |
|                                                                         | Concentration of elements in the solution after precipitation of oxalates [g·L <sup>-1</sup> ] |      |        |      |        |       |       |        |
|                                                                         | B                                                                                              | Co   | Ni     | Fe   | Dy     | Nd    | Pr    | Tb     |
| 0.8                                                                     | 0.608                                                                                          | 1.12 | 0.0154 | 33.1 | 0.122  | 1.05  | 0.111 | 0.0019 |
| 1.0                                                                     | 0.602                                                                                          | 1.21 | 0.0144 | 32.6 | 0.116  | 0.978 | 0.104 | 0.0009 |
| 1.2                                                                     | 0.572                                                                                          | 1.21 | 0.0146 | 31.8 | 0.0519 | 0.476 | 0.043 | 0.0012 |
| 1.4                                                                     | 0.596                                                                                          | 1.18 | 0.014  | 31   | 0.0261 | 0.278 | 0.026 | 0.0009 |
